# Supplementary material for: New Pseudomonas spp. Are Pathogenic to Citrus
Source: PubMed Central journal article supplement (PMC4769151; doi:10.1371/journal.pone.0148796), 2016-02-26
Supplement: pone.0148796.s001.pdf [file pone.0148796.s001.pdf]

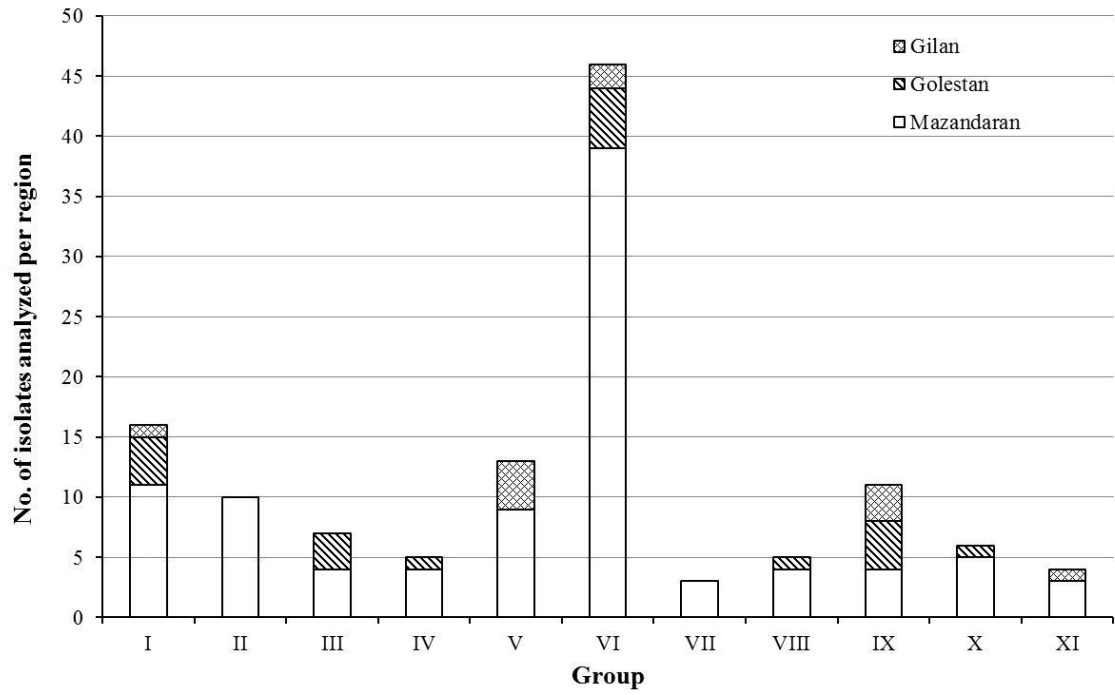

**S1 Fig.** Distribution per geographical region of the 11 groups of strains in this study.
