# Supplementary material for: New Pseudomonas spp. Are Pathogenic to Citrus
Source: PubMed Central journal article supplement (PMC4769151; doi:10.1371/journal.pone.0148796), 2016-02-26
Supplement: pone.0148796.s003.pdf [file pone.0148796.s003.pdf]

**S2 Table.** List of the strains used in this study and their assignation to phenotypic clusters and phylogenetic groups in the *rpoD* gene tree and in the MLSA analysis.

| Strain | Phenotypic cluster | <i>rpoD</i> group | <i>rpoD</i> closest type strain              | Similarity (%) | Phylogenetic group (3 genes) | Closest type strain (3 genes)                                                              | Similarity (%) | Species assignation (97% 3 genes) |
|--------|--------------------|-------------------|----------------------------------------------|----------------|------------------------------|--------------------------------------------------------------------------------------------|----------------|-----------------------------------|
| FBF1   | I                  | I                 | <i>P. orientalis</i> DSM 17489 <sup>T</sup>  | 97.8           | I                            | <i>P. orientalis</i> DSM 17489 <sup>T</sup>                                                | 97             | <i>P. orientalis</i>              |
| FBF2   | IX                 | IX                | <i>P. moraviensis</i> DSM 16007 <sup>T</sup> | 97.2           | IX                           | <i>P. moraviensis</i> DSM 16007 <sup>T</sup>                                               | 97.2           | <i>P. moraviensis</i>             |
| FBF5   | IV                 | IV                | <i>P. lurida</i> P513/18 <sup>T</sup>        | 99.5           | IV                           | <i>P. lurida</i> P513/18 <sup>T</sup>                                                      | 99.6           | <i>P. lurida</i>                  |
| FBF7   | II                 | II                | <i>P. synxantha</i> LMG 2335 <sup>T</sup>    | 93.3           | II                           | <i>P. synxantha</i> LMG 2335 <sup>T</sup>                                                  | 96             | Putative new species              |
| FBF8   | II                 | II                | <i>P. synxantha</i> LMG 2335 <sup>T</sup>    | 93.7           | II                           | <i>P. synxantha</i> LMG 2335 <sup>T</sup>                                                  | 96             | Putative new species              |
| FBF9   | I                  | I                 | <i>P. orientalis</i> DSM 17489 <sup>T</sup>  | 97.8           | nd                           |                                                                                            |                | <i>P. orientalis</i>              |
| FBF10  | I                  | I                 | <i>P. orientalis</i> DSM 17489 <sup>T</sup>  | 97.8           | nd                           |                                                                                            |                | <i>P. orientalis</i>              |
| FBF11  | I                  | I                 | <i>P. orientalis</i> DSM 17489 <sup>T</sup>  | 97.8           | nd                           |                                                                                            |                | <i>P. orientalis</i>              |
| FBF12  | VI-A               | VI-A              | <i>P. syringae</i> ATCC 19310 <sup>T</sup>   | 97.4           | nd                           |                                                                                            |                | <i>P. syringae</i>                |
| FBF13  | VI-C               | VI-C              | <i>P. syringae</i> ATCC 19310 <sup>T</sup>   | 97.5           | VI                           | <i>P. tremae</i> LMG 22121 <sup>T</sup> / <i>P. syringae</i> ATCC 19310 <sup>T</sup>       | 97.1           | <i>P. tremae</i>                  |
| FBF15  | X                  | X                 | <i>P. monteilii</i> ATCC 700476 <sup>T</sup> | 99             | nd                           |                                                                                            |                | <i>P. monteilii</i>               |
| FBF16  | nd                 | VI-B              | <i>P. syringae</i> ATCC 19310 <sup>T</sup>   | 98.2           | nd                           |                                                                                            |                | <i>P. tremae</i>                  |
| FBF17  | I                  | I                 | <i>P. orientalis</i> DSM 17489 <sup>T</sup>  | 97.8           | nd                           |                                                                                            |                | <i>P. orientalis</i>              |
| FBF18  | XI                 | XI                | <i>P. japonica</i> JCM 21532 <sup>T</sup>    | 81.2           | XI                           | <i>P. japonica</i> JCM 21532 <sup>T</sup>                                                  | 91.9           | Putative new species              |
| FBF19  | XI                 | XI                | <i>P. japonica</i> JCM 21532 <sup>T</sup>    | 81.2           | XI                           | <i>P. japonica</i> JCM 21532 <sup>T</sup>                                                  | 91.9           | Putative new species              |
| FBF20  | IV                 | IV                | <i>P. lurida</i> P513/18 <sup>T</sup>        | 99.5           | nd                           |                                                                                            |                | <i>P. lurida</i>                  |
| FBF21  | V                  | V                 | <i>P. rhodesiae</i> LMG 17764 <sup>T</sup>   | 91.7           | V                            | <i>P. marginalis</i> ATCC 10844 <sup>T</sup> / <i>P. grimontii</i> CIP 106645 <sup>T</sup> | 94.8           | Putative new species              |

|       |      |      |                                             |      |      |                                                                                            |      |                      |
|-------|------|------|---------------------------------------------|------|------|--------------------------------------------------------------------------------------------|------|----------------------|
| FBF22 | V    | V    | <i>P. rhodesiae</i> LMG 17764 <sup>T</sup>  | 91.7 | nd   |                                                                                            |      | Putative new species |
| FBF23 | II   | II   | <i>P. libanensis</i> CIP105460 <sup>T</sup> | 93.7 | II   | <i>P. synxantha</i> LMG 2335 <sup>T</sup>                                                  | 96   | Putative new species |
| FBF24 | VIII | VIII | <i>P. syringae</i> ATCC 19310 <sup>T</sup>  | 85.2 | VIII | <i>P. meliae</i> CCUG 51503 <sup>T</sup>                                                   | 91.6 | Putative new species |
| FBF25 | I    | IV   | <i>P. lurida</i> P513/18 <sup>T</sup>       | 99.5 | IV   | <i>P. lurida</i> P513/18 <sup>T</sup>                                                      | 99.7 | <i>P. lurida</i>     |
| FBF27 | VI-D | VI-D | <i>P. syringae</i> ATCC 19310 <sup>T</sup>  | 99.7 | nd   |                                                                                            |      | <i>P. syringae</i>   |
| FBF28 | V    | V    | <i>P. rhodesiae</i> LMG 17764 <sup>T</sup>  | 91.7 | nd   |                                                                                            |      | Putative new species |
| FBF30 | V    | V    | <i>P. rhodesiae</i> LMG 17764 <sup>T</sup>  | 91.7 | V    | <i>P. marginalis</i> ATCC 10844 <sup>T</sup> / <i>P. grimontii</i> CIP 106645 <sup>T</sup> | 94.9 | Putative new species |
| FBF31 | IV   | IV   | <i>P. lurida</i> P513/18 <sup>T</sup>       | 99.5 | IV   | <i>P. lurida</i> P513/18 <sup>T</sup>                                                      | 99.7 | <i>P. lurida</i>     |
| FBF32 | VI-A | VI-A | <i>P. syringae</i> ATCC 19310 <sup>T</sup>  | 97.5 | nd   |                                                                                            |      | <i>P. syringae</i>   |
| FBF33 | VI-B | VI-B | <i>P. syringae</i> ATCC 19310 <sup>T</sup>  | 98   | VI   | <i>P. tremae</i> LMG 22121 <sup>T</sup>                                                    | 97.1 | <i>P. tremae</i>     |
| FBF34 | I    | I    | <i>P. orientalis</i> DSM 17489 <sup>T</sup> | 97.8 | nd   |                                                                                            |      | <i>P. orientalis</i> |
| FBF35 | XI   | XI   | <i>P. japonica</i> JCM 21532 <sup>T</sup>   | 81.2 | XI   | <i>P. japonica</i> JCM 21532 <sup>T</sup>                                                  | 91.9 | Putative new species |
| FBF36 | VI-B | VI-B | <i>P. syringae</i> ATCC 19310 <sup>T</sup>  | 98.2 | VI   | <i>P. tremae</i> LMG 22121 <sup>T</sup>                                                    | 97.3 | <i>P. tremae</i>     |
| FBF38 | V    | V    | <i>P. rhodesiae</i> LMG 17764 <sup>T</sup>  | 91.7 | V    | <i>P. marginalis</i> ATCC 10844 <sup>T</sup> / <i>P. grimontii</i> CIP 106645 <sup>T</sup> | 94.9 | Putative new species |
| FBF39 | V    | V    | <i>P. rhodesiae</i> LMG 17764 <sup>T</sup>  | 91.7 | nd   |                                                                                            |      | Putative new species |
| FBF40 | VI-B | VI-B | <i>P. syringae</i> ATCC 19310 <sup>T</sup>  | 98   | nd   |                                                                                            |      | <i>P. tremae</i>     |
| FBF41 | II   | II   | <i>P. libanensis</i> CIP105460 <sup>T</sup> | 93.7 | nd   |                                                                                            |      | Putative new species |
| FBF42 | IV   | IV   | <i>P. lurida</i> P513/18 <sup>T</sup>       | 99.5 | IV   | <i>P. lurida</i> P513/18 <sup>T</sup>                                                      | 99.7 | <i>P. lurida</i>     |
| FBF43 | I    | I    | <i>P. orientalis</i> DSM 17489 <sup>T</sup> | 97.8 | nd   |                                                                                            |      | <i>P. orientalis</i> |
| FBF44 | XI   | XI   | <i>P. japonica</i> JCM 21532 <sup>T</sup>   | 81.2 | XI   | <i>P. japonica</i> JCM 21532 <sup>T</sup>                                                  | 91.9 | Putative new species |
| FBF46 | VI-D | VI-D | <i>P. syringae</i> ATCC 19310 <sup>T</sup>  | 99.7 | VI   | <i>P. syringae</i> ATCC 19310 <sup>T</sup>                                                 | 99.4 | <i>P. syringae</i>   |
| FBF47 | VI-D | VI-D | <i>P. syringae</i> ATCC 19310 <sup>T</sup>  | 99.8 | nd   |                                                                                            |      | <i>P. syringae</i>   |

|       |      |      |                                                                                      |      |      |                                                                                            |      |                       |
|-------|------|------|--------------------------------------------------------------------------------------|------|------|--------------------------------------------------------------------------------------------|------|-----------------------|
| FBF48 | I    | I    | <i>P. orientalis</i> DSM 17489 <sup>T</sup>                                          | 97.8 | I    | <i>P. orientalis</i> DSM 17489 <sup>T</sup>                                                | 97   | <i>P. orientalis</i>  |
| FBF49 | VI-F | VI-B | <i>P. syringae</i> ATCC 19310 <sup>T</sup>                                           | 97.8 | nd   |                                                                                            |      | <i>P. tremae</i>      |
| FBF50 | X    | X    | <i>P. monteilii</i> ATCC 700476 <sup>T</sup>                                         | 94   | X    | <i>P. monteilii</i> ATCC 700476 <sup>T</sup>                                               | 96.5 | Putative new species  |
| FBF51 | I    | I    | <i>P. orientalis</i> DSM 17489 <sup>T</sup>                                          | 97.8 | I    | <i>P. orientalis</i> DSM 17489 <sup>T</sup>                                                | 97   | <i>P. orientalis</i>  |
| FBF52 | VII  | VII  | <i>P. viridiflava</i> ATCC 13223 <sup>T</sup>                                        | 97.8 | VII  | <i>P. viridiflava</i> ATCC 13223 <sup>T</sup>                                              | 99.3 | <i>P. viridiflava</i> |
| FBF53 | V    | V    | <i>P. rhodesiae</i> LMG 17764 <sup>T</sup>                                           | 91.7 | nd   |                                                                                            |      | Putative new species  |
| FBF54 | V    | V    | <i>P. rhodesiae</i> LMG 17764 <sup>T</sup>                                           | 91.7 | V    | <i>P. marginalis</i> ATCC 10844 <sup>T</sup> / <i>P. grimontii</i> CIP 106645 <sup>T</sup> | 94.8 | Putative new species  |
| FBF55 | V    | V    | <i>P. rhodesiae</i> LMG 17764 <sup>T</sup>                                           | 91.7 | V    | <i>P. marginalis</i> ATCC 10844 <sup>T</sup> / <i>P. grimontii</i> CIP 106645 <sup>T</sup> | 94.9 | Putative new species  |
| FBF56 | II   | II   | <i>P. synxantha</i> LMG 2335 <sup>T</sup> / <i>P. veronii</i> LMG 17761 <sup>T</sup> | 93.2 | II   | <i>P. synxantha</i> LMG 2335 <sup>T</sup>                                                  | 96   | Putative new species  |
| FBF57 | X    | X    | <i>P. monteilii</i> ATCC 700476 <sup>T</sup>                                         | 99   | X    | <i>P. monteilii</i> ATCC 700476 <sup>T</sup>                                               | 98.9 | <i>P. monteilii</i>   |
| FBF58 | VIII | VIII | <i>P. syringae</i> ATCC 19310 <sup>T</sup>                                           | 85.4 | VIII | <i>P. meliae</i> CCUG 51503 <sup>T</sup> / <i>P. tremae</i> LMG 22121 <sup>T</sup>         | 91.7 | Putative new species  |
| FBF59 | V    | V    | <i>P. rhodesiae</i> LMG 17764 <sup>T</sup>                                           | 91.7 | V    | <i>P. marginalis</i> ATCC 10844 <sup>T</sup> / <i>P. grimontii</i> CIP 106645 <sup>T</sup> | 94.9 | Putative new species  |
| FBF60 | VI-B | VI-B | <i>P. syringae</i> ATCC 19310 <sup>T</sup>                                           | 98.1 | nd   |                                                                                            |      | <i>P. tremae</i>      |
| FBF61 | VI-A | VI-A | <i>P. syringae</i> ATCC 19310 <sup>T</sup>                                           | 97.1 | nd   |                                                                                            |      | <i>P. syringae</i>    |
| FBF62 | VI-A | VI-A | <i>P. syringae</i> ATCC 19310 <sup>T</sup>                                           | 97.8 | nd   |                                                                                            |      | <i>P. syringae</i>    |
| FBF63 | VI-D | VI-D | <i>P. syringae</i> ATCC 19310 <sup>T</sup>                                           | 99.7 | nd   |                                                                                            |      | <i>P. syringae</i>    |
| FBF64 | I    | I    | <i>P. orientalis</i> DSM 17489 <sup>T</sup>                                          | 97.8 | I    | <i>P. orientalis</i> DSM 17489 <sup>T</sup>                                                | 97   | <i>P. orientalis</i>  |
| FBF65 | IX   | IX   | <i>P. moraviensis</i> DSM 16007 <sup>T</sup>                                         | 94.1 | IX   | <i>P. koreensis</i> LMG 21318 <sup>T</sup>                                                 | 96.8 | Putative new species  |
| FBF66 | I    | I    | <i>P. orientalis</i> DSM 17489 <sup>T</sup>                                          | 97.8 | nd   |                                                                                            |      | <i>P. orientalis</i>  |
| FBF67 | IX   | IX   | <i>P. moraviensis</i> DSM 16007 <sup>T</sup>                                         | 93.6 | nd   |                                                                                            |      | Putative new species  |
| FBF68 | VI-B | VI-B | <i>P. syringae</i> ATCC 19310 <sup>T</sup>                                           | 98   | nd   |                                                                                            |      | <i>P. tremae</i>      |

|       |      |      |                                              |      |    |                                             |    |                      |
|-------|------|------|----------------------------------------------|------|----|---------------------------------------------|----|----------------------|
| FBF69 | VI-A | VI-A | <i>P. syringae</i> ATCC 19310 <sup>T</sup>   | 97.8 | nd |                                             |    | <i>P. syringae</i>   |
| FBF71 | VI-C | VI-C | <i>P. syringae</i> ATCC 19310 <sup>T</sup>   | 97.1 | nd |                                             |    | <i>P. tremae</i>     |
| FBF72 | VI-C | VI-C | <i>P. syringae</i> ATCC 19310 <sup>T</sup>   | 97.4 | nd |                                             |    | <i>P. tremae</i>     |
| FBF73 | V    | V    | <i>P. rhodesiae</i> LMG 17764 <sup>T</sup>   | 91.7 | nd |                                             |    | Putative new species |
| FBF74 | VI-C | VI-C | <i>P. syringae</i> ATCC 19310 <sup>T</sup>   | 97.5 | nd |                                             |    | <i>P. tremae</i>     |
| FBF75 | V    | V    | <i>P. rhodesiae</i> LMG 17764 <sup>T</sup>   | 91.7 | nd |                                             |    | Putative new species |
| FBF77 | VI-B | VI-B | <i>P. syringae</i> ATCC 19310 <sup>T</sup>   | 98.2 | nd |                                             |    | <i>P. tremae</i>     |
| FBF78 | VI-B | VI-B | <i>P. syringae</i> ATCC 19310 <sup>T</sup>   | 98.2 | nd |                                             |    | <i>P. tremae</i>     |
| FBF79 | VI-B | VI-B | <i>P. syringae</i> ATCC 19310 <sup>T</sup>   | 97.5 | nd |                                             |    | <i>P. tremae</i>     |
| FBF80 | I    | I    | <i>P. orientalis</i> DSM 17489 <sup>T</sup>  | 97.8 | nd |                                             |    | <i>P. orientalis</i> |
| FBF81 | I    | I    | <i>P. orientalis</i> DSM 17489 <sup>T</sup>  | 97.8 | nd |                                             |    | <i>P. orientalis</i> |
| FBF82 | VI-F | VI-B | <i>P. syringae</i> ATCC 19310 <sup>T</sup>   | 98.2 | nd |                                             |    | <i>P. tremae</i>     |
| FBF83 | VI-B | VI-B | <i>P. syringae</i> ATCC 19310 <sup>T</sup>   | 97.7 | nd |                                             |    | <i>P. tremae</i>     |
| FBF84 | I    | I    | <i>P. orientalis</i> DSM 17489 <sup>T</sup>  | 97.8 | I  | <i>P. orientalis</i> DSM 17489 <sup>T</sup> | 97 | <i>P. orientalis</i> |
| FBF85 | IX   | IX   | <i>P. moraviensis</i> DSM 16007 <sup>T</sup> | 94.1 | nd |                                             |    | Putative new species |
| FBF86 | I    | I    | <i>P. orientalis</i> DSM 17489 <sup>T</sup>  | 97.8 | I  | <i>P. orientalis</i> DSM 17489 <sup>T</sup> | 97 | <i>P. orientalis</i> |
| FBF87 | IX   | IX   | <i>P. moraviensis</i> DSM 16007 <sup>T</sup> | 94.1 | nd |                                             |    | Putative new species |
| FBF88 | IX   | IX   | <i>P. moraviensis</i> DSM 16007 <sup>T</sup> | 94.1 | nd |                                             |    | Putative new species |
| FBF89 | IX   | IX   | <i>P. moraviensis</i> DSM 16007 <sup>T</sup> | 94   | nd |                                             |    | Putative new species |
| FBF90 | IX   | IX   | <i>P. moraviensis</i> DSM 16007 <sup>T</sup> | 94.1 | nd |                                             |    | Putative new species |
| FBF91 | VI-F | VI-B | <i>P. syringae</i> ATCC 19310 <sup>T</sup>   | 98   | nd |                                             |    | <i>P. tremae</i>     |

|        |      |      |                                               |      |      |                                                                                            |       |                      |
|--------|------|------|-----------------------------------------------|------|------|--------------------------------------------------------------------------------------------|-------|----------------------|
| FBF92  | IX   | IX   | <i>P. moraviensis</i> DSM 16007 <sup>T</sup>  | 94.1 | IX   | <i>P. koreensis</i> LMG 21318 <sup>T</sup>                                                 | 96.8  | Putative new species |
| FBF93  | V    | V    | <i>P. rhodesiae</i> LMG 17764 <sup>T</sup>    | 91.7 | V    | <i>P. marginalis</i> ATCC 10844 <sup>T</sup> / <i>P. grimontii</i> CIP 106645 <sup>T</sup> | 94.8  | Putative new species |
| FBF95  | I    | I    | <i>P. orientalis</i> DSM 17489 <sup>T</sup>   | 97.8 | nd   |                                                                                            |       | <i>P. orientalis</i> |
| FBF96  | IX   | IX   | <i>P. moraviensis</i> DSM 16007 <sup>T</sup>  | 94.1 | IX   | <i>P. koreensis</i> LMG 21318 <sup>T</sup>                                                 | 96.8  | Putative new species |
| FBF97  | VI-B | VI-B | <i>P. syringae</i> ATCC 19310 <sup>T</sup>    | 98.2 | nd   |                                                                                            |       | <i>P. tremae</i>     |
| FBF98  | VI-C | VI-C | <i>P. syringae</i> ATCC 19310 <sup>T</sup>    | 97.5 | nd   |                                                                                            |       | <i>P. tremae</i>     |
| FBF99  | IX   | IX   | <i>P. moraviensis</i> DSM 16007 <sup>T</sup>  | 94.1 | IX   | <i>P. moraviensis</i> DSM 16007 <sup>T</sup> / <i>P. koreensis</i> LMG 21318 <sup>T</sup>  | 96.2  | Putative new species |
| FBF100 | VII  | VII  | <i>P. viridiflava</i> ATCC 13223 <sup>T</sup> | 91.8 | VII  | <i>P. viridiflava</i> ATCC 13223 <sup>T</sup>                                              | 95.6  | Putative new species |
| FBF101 | X    | X    | <i>P. monteilii</i> ATCC 700476 <sup>T</sup>  | 94   | X    | <i>P. monteilii</i> ATCC 700476 <sup>T</sup>                                               | 96.2  | Putative new species |
| FBF102 | VIII | VIII | <i>P. syringae</i> ATCC 19310 <sup>T</sup>    | 85   | VIII | <i>P. meliae</i> CCUG 51503 <sup>T</sup>                                                   | 91.7  | Putative new species |
| FBF103 | VIII | VIII | <i>P. syringae</i> ATCC 19310 <sup>T</sup>    | 85.4 | VIII | <i>P. meliae</i> CCUG 51503 <sup>T</sup> / <i>P. tremae</i> LMG 22121 <sup>T</sup>         | 91.6  | Putative new species |
| FBF104 | VI-A | VI-A | <i>P. syringae</i> ATCC 19310 <sup>T</sup>    | 97.5 | nd   |                                                                                            |       | <i>P. syringae</i>   |
| FBF105 | X    | X    | <i>P. monteilii</i> ATCC 700476 <sup>T</sup>  | 94   | X    | <i>P. monteilii</i> ATCC 700476 <sup>T</sup>                                               | 96.6  | Putative new species |
| FBF106 | VI-B | VI-B | <i>P. syringae</i> ATCC 19310 <sup>T</sup>    | 98.2 | nd   |                                                                                            |       | <i>P. tremae</i>     |
| FBF107 | VI-C | VI-C | <i>P. syringae</i> ATCC 19310 <sup>T</sup>    | 97.5 | nd   |                                                                                            |       | <i>P. tremae</i>     |
| FBF108 | VI-C | VI-C | <i>P. syringae</i> ATCC 19310 <sup>T</sup>    | 97.5 | nd   |                                                                                            |       | <i>P. tremae</i>     |
| FBF109 | VI-E | VI-E | <i>P. syringae</i> ATCC 19310 <sup>T</sup>    | 98   | nd   |                                                                                            |       | <i>P. syringae</i>   |
| FBF110 | III  | III  | <i>P. simiae</i> OLI <sup>T</sup>             | 99.8 | III  | <i>P. simiae</i> OLI <sup>T</sup>                                                          | 99.96 | <i>P. simiae</i>     |
| FBF111 | VI-D | VI-D | <i>P. syringae</i> ATCC 19310 <sup>T</sup>    | 99.7 | nd   |                                                                                            |       | <i>P. syringae</i>   |
| FBF112 | III  | III  | <i>P. simiae</i> OLI <sup>T</sup>             | 99.8 | III  | <i>P. simiae</i> OLI <sup>T</sup>                                                          | 99.96 | <i>P. simiae</i>     |
| FBF113 | VI-B | VI-B | <i>P. syringae</i> ATCC 19310 <sup>T</sup>    | 97.5 | nd   |                                                                                            |       | <i>P. tremae</i>     |

|        |      |      |                                                                                         |      |      |                                              |       |                       |
|--------|------|------|-----------------------------------------------------------------------------------------|------|------|----------------------------------------------|-------|-----------------------|
| FBF114 | X    | X    | <i>P. monteilii</i> ATCC 700476 <sup>T</sup>                                            | 94   | X    | <i>P. monteilii</i> ATCC 700476 <sup>T</sup> | 95.8  | Putative new species  |
| FBF115 | VI-B | VI-B | <i>P. syringae</i> ATCC 19310 <sup>T</sup>                                              | 96.8 | nd   |                                              |       | <i>P. tremae</i>      |
| FBF116 | VI-B | VI-B | <i>P. syringae</i> ATCC 19310 <sup>T</sup>                                              | 97.1 | nd   |                                              |       | <i>P. tremae</i>      |
| FBF117 | VII  | VII  | <i>P. viridiflava</i> ATCC 13223 <sup>T</sup>                                           | 97.7 | nd   |                                              |       | <i>P. viridiflava</i> |
| FBF118 | VI-C | VI-C | <i>P. syringae</i> ATCC 19310 <sup>T</sup>                                              | 97.5 | nd   |                                              |       | <i>P. tremae</i>      |
| FBF119 | VI-A | VI-A | <i>P. syringae</i> ATCC 19310 <sup>T</sup>                                              | 97.5 | nd   |                                              |       | <i>P. syringae</i>    |
| FBF120 | III  | III  | <i>P. simiae</i> OLI <sup>T</sup>                                                       | 99.7 | III  | <i>P. simiae</i> OLI <sup>T</sup>            | 99.96 | <i>P. simiae</i>      |
| FBF121 | III  | III  | <i>P. simiae</i> OLI <sup>T</sup>                                                       | 99.8 | nd   |                                              |       | <i>P. simiae</i>      |
| FBF122 | VIII | VIII | <i>P. syringae</i> ATCC 19310 <sup>T</sup>                                              | 85.2 | VIII | <i>P. meliae</i> CCUG 51503 <sup>T</sup>     | 91.6  | Putative new species  |
| FBF124 | VI-B | VI-C | <i>P. syringae</i> ATCC 19310 <sup>T</sup>                                              | 97.8 | VI   | <i>P. tremae</i> LMG 22121 <sup>T</sup>      | 97.3  | <i>P. tremae</i>      |
| FBF125 | VI-E | VI-E | <i>P. syringae</i> ATCC 19310 <sup>T</sup>                                              | 97.5 | nd   |                                              |       | <i>P. syringae</i>    |
| FBF126 | III  | III  | <i>P. simiae</i> OLI <sup>T</sup>                                                       | 99.8 | nd   |                                              |       | <i>P. simiae</i>      |
| FBF128 | III  | III  | <i>P. simiae</i> OLI <sup>T</sup>                                                       | 99.8 | nd   |                                              |       | <i>P. simiae</i>      |
| FBF130 | III  | III  | <i>P. simiae</i> OLI <sup>T</sup>                                                       | 99.8 | nd   |                                              |       | <i>P. simiae</i>      |
| FBF134 | VI-C | VI-C | <i>P. syringae</i> ATCC 19310 <sup>T</sup>                                              | 97.5 | nd   |                                              |       | <i>P. tremae</i>      |
| FBF135 | VI-E | VI-E | <i>P. syringae</i> ATCC 19310 <sup>T</sup>                                              | 97.2 | VI   | <i>P. syringae</i> ATCC 19310 <sup>T</sup>   | 98.6  | <i>P. syringae</i>    |
| FBF136 | VI-B | VI-C | <i>P. syringae</i> ATCC 19310 <sup>T</sup>                                              | 97.8 | VI   | <i>P. tremae</i> LMG 22121 <sup>T</sup>      | 97.3  | <i>P. tremae</i>      |
| FBF138 | VI-D | VI-D | <i>P. syringae</i> ATCC 19310 <sup>T</sup>                                              | 99.7 | VI   | <i>P. syringae</i> ATCC 19310 <sup>T</sup>   | 99.3  | <i>P. syringae</i>    |
| FBF139 | VI-B | VI-B | <i>P. syringae</i> ATCC 19310 <sup>T</sup>                                              | 98.2 | nd   |                                              |       | <i>P. tremae</i>      |
| FBF140 | nd   | II   | <i>P. synxantha</i> LMG 2335 <sup>T</sup>                                               | 85.4 | nd   |                                              |       | Putative new species  |
| FBF141 | nd   | II   | <i>P. synxantha</i> LMG 2335 <sup>T</sup> /<br><i>P. veronii</i> LMG 17761 <sup>T</sup> | 92.5 | nd   |                                              |       | Putative new species  |
| FBF142 | nd   | II   | <i>P. synxantha</i> LMG 2335 <sup>T</sup> /<br><i>P. veronii</i> LMG 17761 <sup>T</sup> | 92.5 | nd   |                                              |       | Putative new species  |

|        |    |    |                                                                                         |      |    |                      |
|--------|----|----|-----------------------------------------------------------------------------------------|------|----|----------------------|
| FBF143 | nd | II | <i>P. veronii</i> LMG 17761 <sup>T</sup>                                                | 92   | nd | Putative new species |
| FBF144 | nd | II | <i>P. synxantha</i> LMG 2335 <sup>T</sup> /<br><i>P. veronii</i> LMG 17761 <sup>T</sup> | 92.6 | nd | Putative new species |

---

nd, not determined
